# Supplementary material
Source: PubMed Central journal article supplement (PMC3033710)
Supplement: supp_mol.110.067363_mol_pharm_147_suppl_REV.pdf [file supp_mol.110.067363_mol_pharm_147_suppl_REV.pdf]

**Supplemental Data**

Regulation of M<sub>3</sub> Muscarinic Receptor Expression and Function by Transmembrane  
Protein 147

Erica Rosemond, Mario Rossi, Sara M. McMillin, Marco Scarselli, Julie G. Donaldson,  
and Jürgen Wess

## Supplemental Table 1

M3R-interacting proteins identified in a membrane-based yeast two-hybrid screen

| <b>Protein</b>                                                                | <b>Accession No.</b>    |
|-------------------------------------------------------------------------------|-------------------------|
| <b>Tetraspanin family</b>                                                     |                         |
| CD82                                                                          | AAB23825                |
| CD9                                                                           | P21926                  |
| CD63                                                                          | AAV38940                |
| <b>Ubiquitin-associated proteins</b>                                          |                         |
| Small ubiquitin-related modifier 2 precursor (SUMO-1)                         | AAC50996                |
| Small ubiquitin-related modifier 2 precursor (SUMO-2)                         | P61956                  |
| UBC protein                                                                   | AAH08955                |
| Ubiquitin C                                                                   | NP_066289               |
| <b>Receptor proteins/Transmembrane proteins</b>                               |                         |
| Transmembrane protein 147                                                     | AAH01118 /<br>BC001118  |
| G protein-coupled receptor 37                                                 | NP_005293               |
| Homo sapiens G protein-coupled receptor, family C, group 5, member B (GPRC5B) | NM_016235 /<br>AAF05331 |
| Rhodopsin                                                                     | NP_000530               |
| Aquaporin-4 (AQP-4)                                                           | P55087                  |
| Glutamate receptor, ionotropic, N-methyl D-aspartate-associated protein 1     | NP_001009184            |
| Sodium channel, voltage gated, type VIII, alpha                               | NP_055006               |
| Transmembrane 9 superfamily member 2                                          | CAH71381                |
| Transmembrane protein 14A                                                     | AAH19328                |
| <b>Signaling molecules</b>                                                    |                         |
| Phosphatidic acid phosphatase type 2C                                         | AAP35667                |
| Calmodulin 2                                                                  | AAH08437                |
| Protein kinase Njmu-R1                                                        | AAH54035                |
| 2',3'-Cyclic nucleotide 3' phosphodiesterase (CNP)                            | AAH06392                |
| <b>Solute carrier proteins</b>                                                |                         |
| Solute carrier family 39 (zinc transporter), member 3 isoform a               | NP_653165               |
| Solute carrier family 22 (organic cation transporter), member 17 isoform b    | NP_057693               |
| Solute carrier family 31 (copper transporters), member 2                      | NP_001851               |
| Solute carrier family 35, member B1                                           | NP_005818               |
| FXFD domain-containing ion transport regulator 6                              | NP_071286               |

**PLP domain-containing proteins**

|                                                                                           |          |
|-------------------------------------------------------------------------------------------|----------|
| Glycoprotein M6B isoform 1 variant                                                        | BAD92762 |
| Proteolipid protein 1 (Pelizaeus-Merzbacher disease, spastic paraplegia 2, uncomplicated) | CAA98191 |

**Signal sequence proteins**

|                                                                                                          |           |
|----------------------------------------------------------------------------------------------------------|-----------|
| Homo sapiens signal sequence receptor, gamma (translocon-associated protein gamma) [synthetic construct] | AAP36250  |
| Signal sequence receptor gamma subunit                                                                   | AAH17203  |
| Signal peptidase complex subunit 1 homolog                                                               | NP_054760 |
| Signal peptidase 12 kDa subunit                                                                          | AAL31361  |

**Other proteins**

|                                                                            |              |
|----------------------------------------------------------------------------|--------------|
| Nogo-A protein short form                                                  | AAG40878     |
| LAG1 longevity assurance homolog 2, isoform 1                              | AAH10032     |
| FLJ20489 protein                                                           | AAH65033     |
| Yip1 domain family, member 6                                               | NP_776195    |
| HCV F-transactivated protein 1                                             | AAT35812     |
| BCL2/adenovirus E1B 19kDa interacting protein 3-like                       | AAV38308     |
| Growth-inhibiting gene 5 protein                                           | AAS00486     |
| B-cell receptor-associated protein 31 variant (BAP31)                      | BAD96214     |
| Delta-notch-like EGF repeat-containing transmembrane                       | NP_620711    |
| Claudin 5                                                                  | AAP35918     |
| Immediate early response 3 interacting protein 1                           | NP_057181    |
| BAX inhibitor 1                                                            | AAU29521     |
| Tumor differentially expressed protein 1 variant                           | BAD96643     |
| HSPC288                                                                    | AAF28966     |
| Leptin receptor overlapping transcript-like 1                              | AAH00642     |
| Interferon induced transmembrane protein 1                                 | AAH00897     |
| Homolog of yeast long chain polyunsaturated fatty acid elongation          | AAH67123     |
| BM88 antigen                                                               | AAH34732     |
| Thymopoietin isoform gamma                                                 | NP_001027455 |
| Myelin and lymphocyte protein (T-lymphocyte maturation-associated protein) | P21145       |
| Ovarian carcinoma immunoreactive antigen                                   | AAG45220     |
| Syntaxin 8                                                                 | NP_004844    |
| ZMYM6 protein                                                              | AAH29439     |
| $\beta$ -amyloid precursor-like protein 2 (APLP-2)                         | AAA35526     |
| Prostaglandin D2 synthase 21kDa                                            | CAI12758     |
| Intercellular adhesion molecule 2 precursor variant                        | BAD93115     |
| Thymic dendritic cell-derived factor 1                                     | AAH16374     |
| NADH dehydrogenase subunit 4                                               | ABB91083     |
| NADH dehydrogenase subunit 4L                                              | AAX53836     |
| Lysosomal-associated protein transmembrane 4 alpha                         | AAH00421     |
| Sterol-C4-methyl oxidase-like isoform 1                                    | NP_006736    |

|                                                                                     |          |
|-------------------------------------------------------------------------------------|----------|
| Dolichyl-phosphate mannosyltransferase polypeptide 2, regulatory subunit, isoform 1 | AAH15233 |
| Histone deacetylase-like protein                                                    | CAA09893 |
| ATP synthase, H <sup>+</sup> transporting, mitochondrial F0 complex, subunit        | AAI06882 |
| ATPase, H <sup>+</sup> transporting, lysosomal 21kDa, V0 subunit c"                 | CAI16801 |
| ATP synthase F0 subunit 6                                                           | AAU02441 |
| Selenoprotein K                                                                     | Q9Y6D0   |

|                |                                                                       |     |
|----------------|-----------------------------------------------------------------------|-----|
| D.melanogaster | MTLYHFGNCVALL-TPYYFTYKYSGLSEYGAFWKCVQAGGIYIFTQLVKMLVLATFFYS           | 59  |
| Anopheles      | MTLYHFGNCAALVYVPYYFTYKYSGLSEYGAFWKCVQAGGIYVFTQLCKMLVLATFFPDT          | 60  |
| Xenopus        | MTLFHFGNCFALAYFPYFITYKCSGLSEYNAFWRCVQAGATYLCVQLCKMLFLATFFPTW          | 60  |
| Zebrafish      | MTLFHFGNCFALAYFPYFITYKCSGLSEYNAFWRCVQAGATYLFVRLCKMLFLATFFPTW          | 60  |
| Human          | MTLFHFGNCFALAYFPYFITYKCSGLSEYNAFWRCVQAGVTYLFVQLCKMLFLATFFPTW          | 60  |
| Bovine         | MTLFHFGNCFALAYFPYFITYKCSGLSEYNAFWRCVQAGVTYLFVQLCKMLFLATFFPTW          | 60  |
| Mouse          | MTLFHFGNCFALAYFPYFITYKCSGLSEYNAFWRCVQAGVTYLFVQLCKMLFLATFFPTW          | 60  |
| C.elegans      | MSFFHFINCFALAFAPYFIVYKYSGLINEYSSIWKCATASGGYLLTQLAKLLIIATFFPAL         | 60  |
|                | *:::* * * : * * *::.* * *::.* *::.* * . * . * : . : * * *::.* * * * * |     |
|                |                                                                       |     |
| D.melanogaster | APSSSGE-FNFFAEILRCSMDIADLLGFALILS-RIPGKGHSLKITAGLGWATAEVIISR          | 117 |
| Anopheles      | DTFTEGAPFNFAEFLRCSVDLDFLGLAFVLS-RIPGKGHSLKITAGLGWATAEVIISR            | 119 |
| Xenopus        | EGA--AGAYDFIGEFMKATVDLADLLGLHLVMS-RNAGKGEYKIMVAAMGWATAELVMSR          | 117 |
| Zebrafish      | EGG--AGVYDFVGEFMKATVDMADLLGLHLVMS-RNAGKGEYKIMVAAMGWATAELIMSR          | 117 |
| Human          | EG---GIYDFIGEFMKASVDVADLIGLNLVMS-RNAGKGEYKIMVAALGWATAELIMSR           | 115 |
| Bovine         | EG---GIYDFIGEFMKASVDVADLIGLNLVMS-RNAGKGEYKIMVAALGWATAELIMSR           | 115 |
| Mouse          | EG---GIYDFIGEFMKASVDVADLIGLNLVMS-RNAGKGEYKIMVAALGWATAELIMSR           | 115 |
| C.elegans      | DS---EGFSIVPEFLKSSADIIDVIGLHLLMTNFLAGKGEVRFVVGGLGWGFAHVAHR            | 116 |
|                | : . . . * : . . . : * : * : * : : . . . . . : . . . . . * * . : *     |     |
|                |                                                                       |     |
| D.melanogaster | GIMLWVGARGTEFSWIYILKCLESNVLLVQHITATLIWLFTRHDLNALKPLVSLLLAV            | 177 |
| Anopheles      | GLMLWVGARGAEFSWLYIQKCLESNVLLVQHLSTATLLWLFSTRHDLDRKLVPLVLLVA           | 179 |
| Xenopus        | CLPLWVGARGIEFDWKYIQMSIDSNISLVHYMAVAALVMMWTRYDLPHTYRLPVTVLLGL          | 177 |
| Zebrafish      | CIPLWVGARGIEFDWKYIQMSFDSNISLVHYIAMAAVVMFTRYDLPKSFRLPVAILLGL           | 177 |
| human          | CIPLWVGARGIEFDWKYIQMSIDSNISLVHYIVASAQVMMITRYDLYHTFRPAVLLLMFL          | 175 |
| Bovine         | CIPLWVGARGIEFDWKYIQMSIDSNISLVHYIVASAQVMMITRYDLYHTYRPAVLLLMFL          | 175 |
| Mouse          | CIPLWVGARGIEFDWKYIQMSIDSNISLVHYIVASAQVMMITRYDLYHTFRPAVLLLMFL          | 175 |
| C.elegans      | LVLLWVGARGTAFTWRVQTSLDSSADLLVIVSLACLWMTIR----TPNKFVSPILAM             | 172 |
|                | : * * * * * * * * : : . : * . * : : : * : * * * * * * * : :           |     |
|                |                                                                       |     |
| D.melanogaster | TVFKGVWLEGMLHILTIGPWLTVAVKALVAAVIGFCTLHIYSGLAQQIGI---                 | 227 |
| Anopheles      | TSYRGVWLEGLTHAMSAGPWLSLALKALITSCMGVGLTHIYSGLAQQIGL---                 | 229 |
| Xenopus        | SMYKAFLMDCFVHMFIMGSWTALLKAVITGVLSLSCLTLFVSLVHGN-----                  | 225 |
| Zebrafish      | CVYKGFLELFLVHVFLGSGWTALLVKAVLTGALSLSLFLFVTLVHSN-----                  | 225 |
| Human          | SVYKAFVMETFVHLCSLGSWAALLARAVVTGLLALSTLALYVAVVNVHS----                 | 224 |
| Bovine         | SVYKAFVMETFVHLCSLGSWTALLARALVTGLLALSTLALYVAVVNVHS----                 | 224 |
| Mouse          | SVYKAFVMETFVHLCSLGSWTALLARAVVTGLLALSTLALYVAVVNVHS----                 | 224 |
| C.elegans      | CVFSTFVYQTVQHTFSLYGWLLAFRFAYSIATAILTVVVYSANRTASTRKNE                  | 225 |
|                | : . : * * : : : . . : :                                               |     |

**Supplemental Figure 1. Tmem147 is highly conserved among species.** Human Tmem147 has 99% amino acid homology to bovine and mouse Tmem147, 78% homology to the corresponding zebrafish and *X. laevis* proteins, and ~50% homology to *Anopheles*, *D. melanogaster*, and *C. elegans* Tmem147. "\*", amino acids are identical in all sequences in the alignment; ":", conserved substitutions occur at the indicated positions; ".", semi-conserved substitutions are observed at the indicated positions.

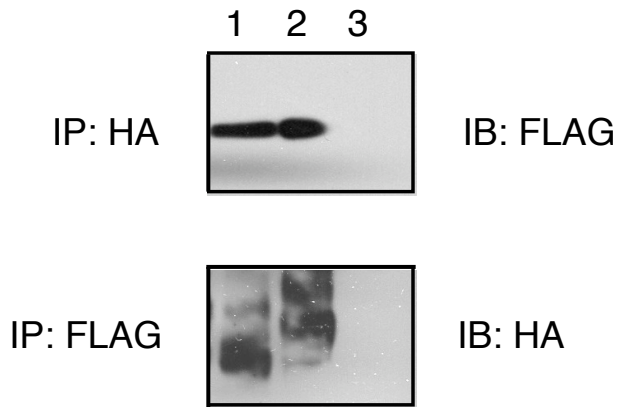

**Supplemental Figure 2. Co-immunoprecipitation of Tmem147 with M<sub>1</sub> muscarinic or V<sub>2</sub> vasopressin receptors in co-transfected COS-7 cells.** Co-immunoprecipitation studies were carried out as described in the legend to Fig. 4 and under Materials and Methods. Lysates were prepared from COS-7 cells that had been co-transfected with Tmem147-FLAG and HA-tagged versions of the M<sub>1</sub> muscarinic or the V<sub>2</sub> vasopressin receptors. Immunoprecipitates were analyzed via Western blotting using an anti-FLAG (upper panel) or an anti-HA antibody (lower panel), respectively. COS-7 cells were co-transfected with either Tmem147-FLAG and the M<sub>1</sub> receptor construct (lane 1), Tmem147-FLAG and the V<sub>2</sub> receptor construct (lane 2), or Tmem147-FLAG and vector DNA (lane 3). Note that the anti-HA antibody detected multiple immunoreactive receptor bands ranging in size from ~60-80 kDa, most likely to heterogeneous glycosylation of the receptors.
